# Supplementary material for: Procoagulant genes may affect angiogenesis, epithelial-mesenchymal transition, survival prognosis and tumor immune microenvironment in patients with urothelial carcinoma
Source: publisher site journal article supplement (doi:10.18632/aging.204860), 2023-07-08
Supplement: Supplementary file [file aging-v15i13-204860-supplementary-material-SD1.pdf]

**SUPPLEMENTARY FIGURES**

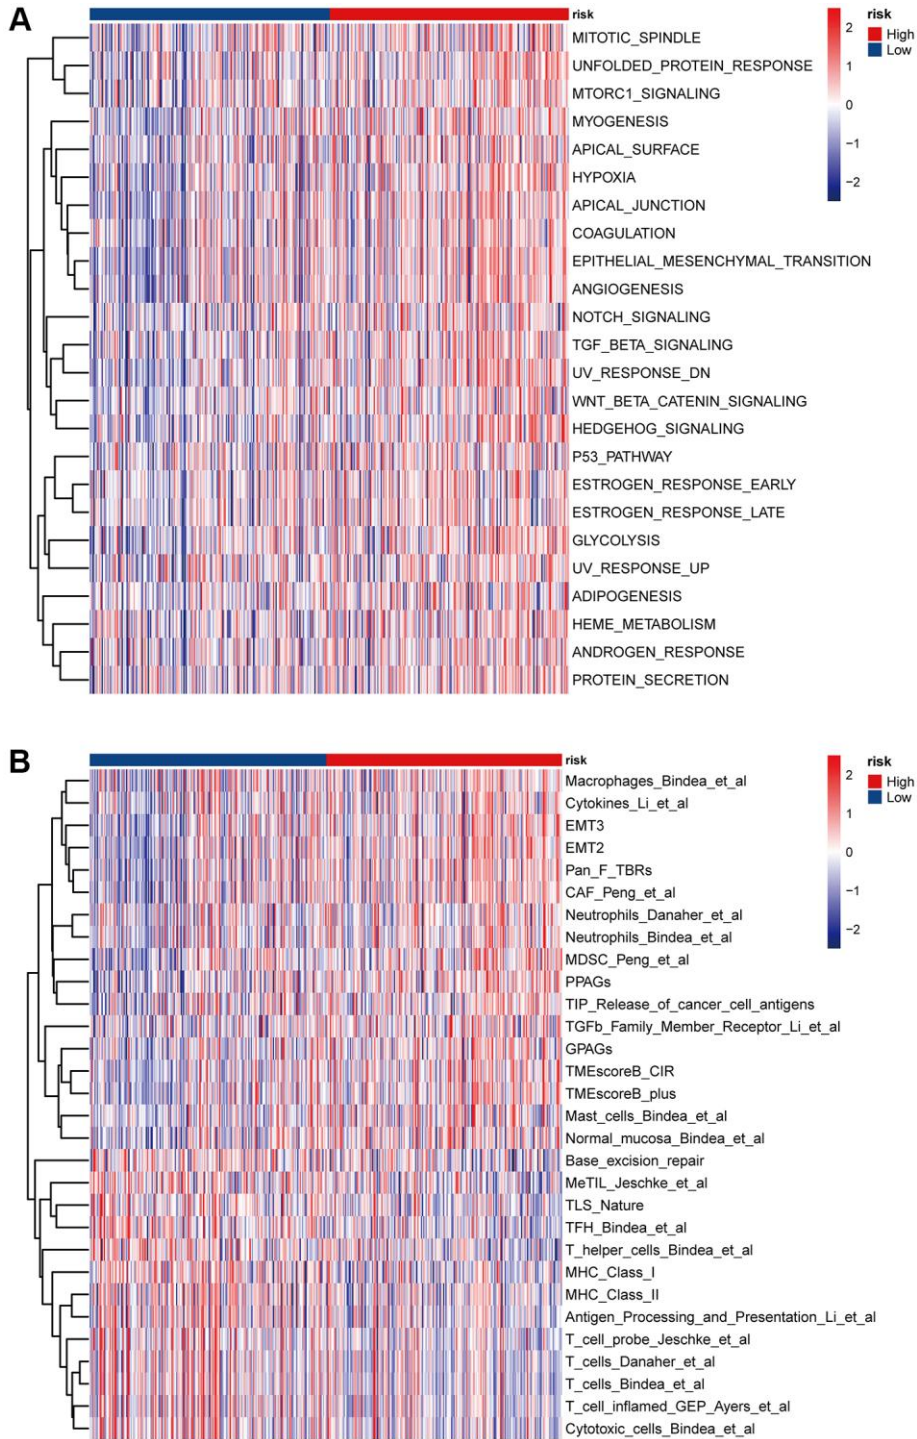

**Supplementary Figure 1. ssGSEA heatmap based on coagulation-related risk signature. (A)** The distribution of high-risk and low-risk groups in metabolic related pathways analysed by ssGSEA. **(B)** The distribution of high-risk and low-risk groups in tumor immune microenvironment related pathways analysed by ssGSEA.

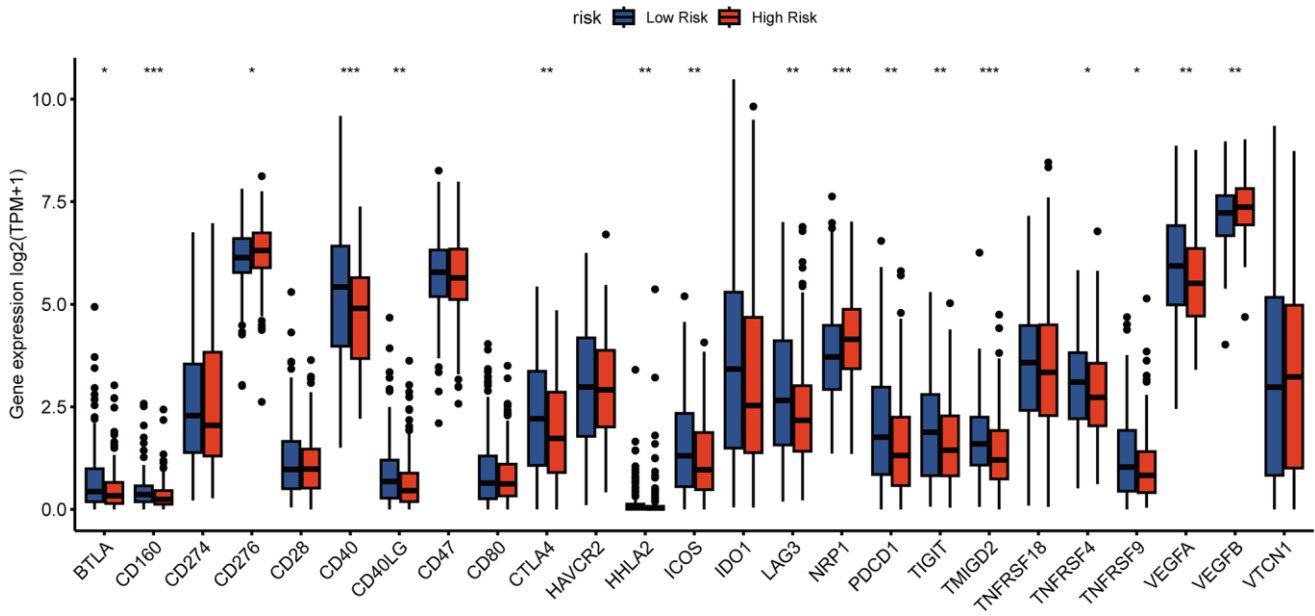

Supplementary Figure 2. Box diagram analysis of immune related markers.
